# Supplementary material
Source: Springer Nature journal article supplement (https://www.springermedizin.de/resource/supplementary/12936_2007_443_MOESM1_ESM.pdf/9547458)
Supplement: MOESM1 [file 9547458]

Cerebral malaria  
247 children

*Excluded:*  
*Age <6 or >60 months = 59*  
*Died before recruitment = 32*

156 recruited

80 randomly assigned  
to placebo

76 randomly assigned  
to mannitol

1 lost to follow

67 survived

13 died

9 died

66 survived
